# Supplementary material for: Schrödinger’s yeast: the challenge of using transformation to compare fitness among Saccharomyces cerevisiae that differ in ploidy or zygosity
Source: PeerJ journal article supplement (doi:10.7717/peerj.16547), 2023-12-05

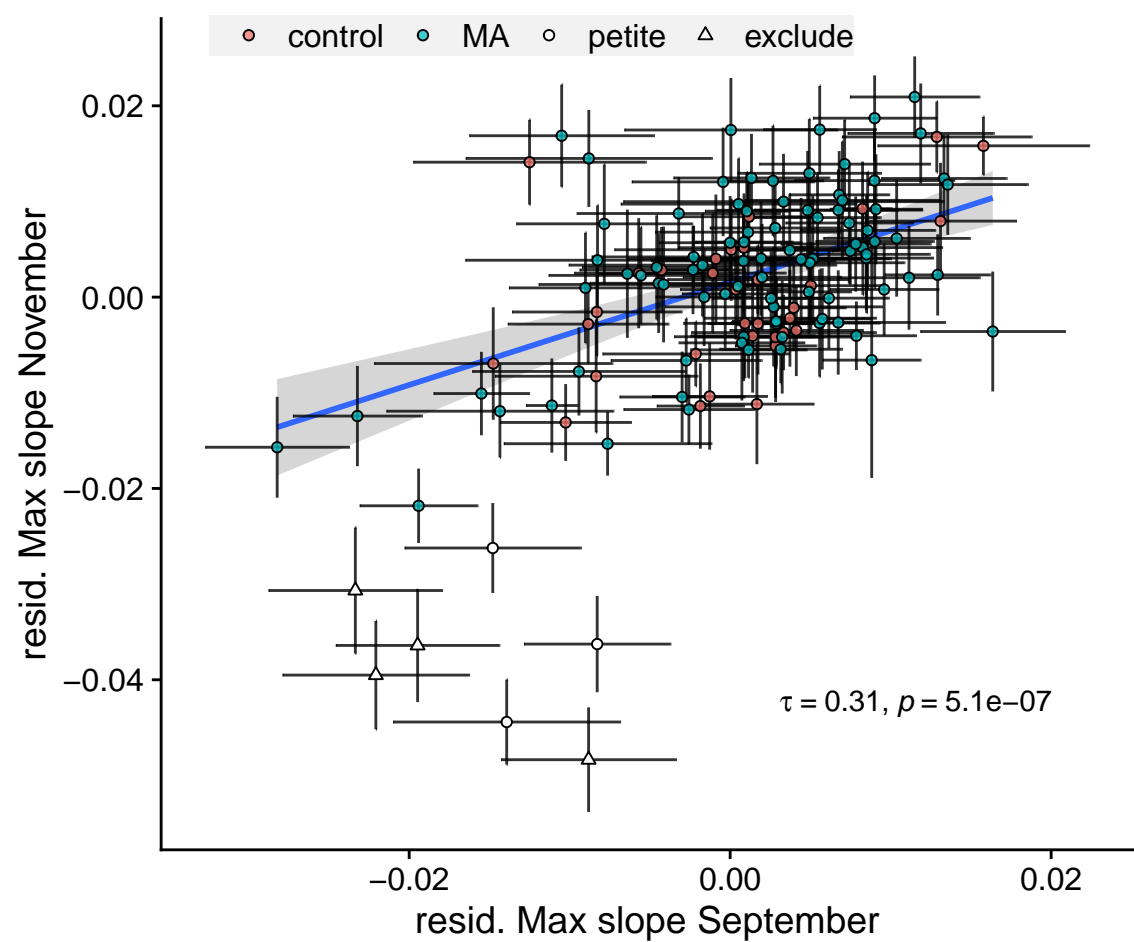

Supplement: FigureS1.pdf [file FigureS1.pdf]
