# Supplementary material for: Schrödinger’s yeast: the challenge of using transformation to compare fitness among Saccharomyces cerevisiae that differ in ploidy or zygosity
Source: PeerJ. 2023 Dec 5;11:e16547. doi: 10.7717/peerj.16547 (PMC10704993; doi:10.7717/peerj.16547)
Supplement: Supplemental Information 2 [file peerj-11-16547-s002.xlsx]

## Sheet: Sheet1
Primer (name)	Sequence (5' -> 3')	Note
OLPr010 STE4 -37 UKO F	TCAAAAAACTGTACAGCTCAATCAGGTACACATTACGATGCGGATCCCCGGGTTAATTAA	Universal amplification of selection marker (TRP1) for knockout (UKO) of STE4 locus pos 4 to 1269. The primers contain homologous sequences upstream (F) and downstream (R) of ste4 and bind to the Universal F1 or Universal R1 region flanking TRP1 on OLP44. The PCR product is used to delete ste4 with TRP1.
OLPr011 STE4 1309 UKO R	ATTGATAATTACTGCTCACAGTATTTCCAATTCGAAGCTAGAATTCGAGCTCGTTTAAAC
OLPr022 STE4 -133 F	TGTGCCAGAACTCAAGGTCA	For genotyping of ste4 locus: the primers bind upstream (F) and downstream (R) of STE4, and PCR is used to determine if TRP1 has replaced ste4 by homologous recombination.
OLPr023 STE4 1402 R	ACGTTTTTGCGCTTCCACAG
OLPr008 MAT -33 UKO F	CTCACTATCTTGCCAATAAGACTCTACCCAGATTTGTATTCGGATCCCCGGGTTAATTAA	Universal amplification of selection marker (HIS3) for knockout (UKO) of MAT locus pos 8 to 2390 (MATa) or 2501 (MATalpha) with point mutation specific to SEY line at MAT +12 (T -> G). The primers contain homologous sequences upstream (F) and downstream (R) of MAT and bind to the Universal F1 or Universal R1 region flanking His3 on OLP45. The PCR product is used to delete MAT locus with His3.
OLPr012 MAT +34 SEY UKO R	TGGTTAAGATAAGAACAAAGAAGGATGCTAAGAATTGATTGAATTCGAGCTCGTTTAAAC
OLPr014 MAT -283 F	CAGTTGCACCGCACAATTCA	For genotyping of the MAT locus: the primers bind upstream (F) and downstream (R) of MAT locus, and PCR is used to determine if His3 has replaced MAT by homologous recombination.
OLPr015 MAT +295 R	CTACTGTGGAGGCACCCAAG
