# Supplementary material for: Schrödinger’s yeast: the challenge of using transformation to compare fitness among Saccharomyces cerevisiae that differ in ploidy or zygosity
Source: PeerJ. 2023 Dec 5;11:e16547. doi: 10.7717/peerj.16547 (PMC10704993; doi:10.7717/peerj.16547)
Supplement: Supplemental Information 3 [file peerj-11-16547-s003.xlsx]

## Sheet: Sheet1
Genotype	Petite status	Correlation coef	P value	Count
Haploid	Grande	0.184	0.077	64
Heterozygote	Petite	-0.108	0.309	57
	Grande	-0.076	0.679	27
Homozygote	Petite	0.092	0.342	63
	Grande	0.033	0.894	23
